# Supplementary material
Source: PubMed Central journal article supplement (PMC4822579)
Supplement: pnas.1522907113.sapp.pdf [file pnas.1522907113.sapp.pdf]

## Supporting Information Appendix

### **Biosynthetic investigation of phomopsins reveals a widespread pathway for ribosomal natural products in Ascomycetes**

Wei Ding, Wan-Qiu Liu, Youli Jia, Yongzhen Li, Wilfred A van der Donk\*, and Qi Zhang\*

#### **Materials and General Methods**

Culture media were from Sinopharm Chemical Reagent Co. Ltd or from Difco laboratories. Chemicals were purchased from Fisher Scientific or from Aldrich unless noted otherwise. Enzymes were from Takara Biotechnology or from Vazyme Biotech Co. Ltd. *Phomopsis leptostromiformis* ATCC 26115 and *Aspergillus oryzae* ATCC 22788 were purchased from ATCC, *Neurospora crassa* CGMCC 3.1604, *Beauveria bassiana* CGMCC 3.3577, and *Metarhizium anisopliae* CGMCC 3.4607 were purchased from China General Microbiological Culture Collection Center (CGMCC). DNA sequencing was performed by the Biotechnology Center at the University of Illinois at Urbana-Champaign. High resolution mass spectra (HRMS) were acquired either using a Synapt ESI quadrupole ToF Mass Spectrometry System (Waters) equipped with an Acquity Ultra Performance Liquid Chromatography (UPLC) system (Waters), or using a Q-Exactive™ Focus Hybrid Quadrupole-Orbitrap Mass Spectrometer (Thermo Fisher) equipped with a Dionex Ultimate 3000 HPLC system (Thermo Fisher).

#### **Genome sequencing and analysis**

Genomic DNA was prepared from stationary liquid cultures using the UltraClean Microbial DNA Isolation Kit (MO BIO Laboratories, Carlsbad, CA). Three libraries were used for genome sequencing. The 800 nt shotgun library was constructed with the TruSeq DNA Sample Prep kit (Illumina, CA), whereas the 3 kb and 8 kb mate-pair libraries were constructed with the Nextera Mate Pair library Sample Prep kit

(Illumina, CA). The libraries were pooled, quantitated by qPCR and sequenced on two lanes for 100 cycles from each end of the fragments on a HiSeq2000 using a TruSeq SBS sequencing kit version 3 and demultiplexed with Casava1.8.2. The genome assemblies were performed using the assembly programs SOAPdeNOVO (1) and Velvet version 1.0.15 (2) at the Keck Center for Comparative and Functional Genomics at the University of Illinois at Urbana-Champaign. The assembled sequences were converted to BLAST database format for local BLAST search using standalone BLAST software (v. 2.2.18). Gene prediction was performed using Geneid (3) and Augustus (4) using *Neurospora crassa* as a reference genome (5), and was manually checked by comparing with homologous gene/proteins in the GenBank database. The data was deposited into the Genbank database under accession number KU645826-KU645844.

### **Construction of the *phomQ*-knockout mutant**

The *hgh*-containing plasmid pQZ101 was constructed according to a previous report (*hgh* is the hygromycin B phosphotransferase gene) (6). Briefly, a 4123 bp fragment containing the whole *trpC* gene (7) (including the promoter to terminator) was amplified from genomic DNA of *Aspergillus nidulans* by PCR using a primer pair *trpC-F* and *trpC-R*, and the resulting fragment was cloned into pMD19-T to generate a subclone construct pTrpC-MD19T. After sequencing to firm the sequence fidelity, the *trpC* cassette was amplified by PCR using a primer pair *re-trpC-F* and *re-trpC-R* and pTrpC-MD19T as the template. The resulting fragment was cloned into the EcoRI/KpnI site of pUC18 by using In-fusion HD Cloning Kit (Clontech) to give a plasmid pTrC-UC18. pQZ101 was constructed from pTrC-UC18 by using the  $\lambda$ -RED mediated PCR-targeting (8). A primer pair *hgh-F* and *hgh-R* was used to amplify the *hgh* gene from pcDNAT3.1/Hygro(+) (Invitrogen). The resulting DNA fragment was then transferred into *E. coli* BW25113/pIJ790/pTrC-UC18 competent cell via electroporation (2.5 kV/cm, 25 $\mu$ F, 200  $\Omega$ , 2 mm) and the cells were plated on LB-agar containing hygromycin B (100  $\mu$ g/mL) to screen for positive clones, which were

confirmed by DNA sequencing.

To inactivate *phomQ*, a primer pair *phomQ-F* and *phomQ-R* was used to amplify the 710 bp internal fragment of *phomQ* from the genomic DNA of *P. leptostromiformis*. The resulting PCR product was treated with the restriction enzymes BamH and HindIII, and was then inserted into the same restriction site of pQZ101 to yield the gene inactivation construct pPhomQ-dis1-QZ101. Preparation of *P. leptostromiformis* protoplast and transformation were performed similarly to a procedure described previously (9). Transformants were grown on Potato Dextrose Agar (PDA) supplemented with 100 µg/mL hygromycin B, and integration of the disruption cassette into the genome was confirmed by PCR using a primer pair *id-php-F* and *id-phomQ-R*.

#### **RNA preparation and cDNA synthesis**

For RNA preparation, all tubes and pipette tips used in the experiments were treated with 0.1% Diethylpyrocarbonate (DEPC) before autoclaving. *P. leptostromiformis* ATCC 26115 was grown in PD liquid medium at room temperature without shaking for 15 days, and the mycelium was collected in sterilized Miracloth, washed two times with saline, pressed dry and massed. *Neurospora crassa* CGMCC 3.1604 and *Beauveria bassiana* CGMCC 3.3577 were grown on PDA plates with cellophane at room temperature, and the mycelia from the cultures grown for 4, 8, and 16 days were collected and combined. Mycelia were frozen by liquid nitrogen, ground extensively, and suspended in ~2 mL of RNA extraction reagent (Vazyme Biotech Co., Ltd) at room temperature for 5 min. The sample was centrifuged at 13,800 x g for 5 min at 4 °C and the supernatant was mixed with 300 µL of chloroform. The resulting solution was vortexed vigorously for 15 s and incubated for 5 min at RT. After centrifugation at 5000 x g for 5 min at 4 °C, the aqueous phase was mixed with an equal volume of isopropyl alcohol and the resulting mixture was placed at -20 °C for 10 min. RNA was collected by centrifugation (13,800 x g, 10 min), washed with 0.5

mL of 75% ethanol, and dissolved in double distilled water (ddH<sub>2</sub>O).

Synthesis of the 1<sup>st</sup> strand of cDNA was performed by using HiScript II 1<sup>st</sup> Strand cDNA Synthesis Kit (Vazyme Biotech Co., Ltd) according to the manufacturer's instructions. Briefly, 1 µL of Oligo dT<sub>23</sub>VN (50 uM), 10 pg-5 µg of total RNA and RNase free ddH<sub>2</sub>O were added together to make a 8 µL mixture, and the mixture was incubated at 65 °C for 5 min before placing on ice for 2 min. Then, 10 µL of 2×RT Mix and 2 µL of HiScript II Enzyme Mix were added to the mixture, and the 1<sup>st</sup> cDNA was reverse transcribed by a two-step procedure at 50 °C for 45 min and then 85 °C for 5 min. The primers used in the transcriptional analysis are given in Table S3.

### **Construction of the plasmid for expressing S-adenosylhomocysteine (SAH) hydrolase**

The SAH hydrolase gene was amplified from the genomic DNA of *Streptomyces coelicolor* A3(2) by using a primer pair *SahH-F* and *SahH-R*. The PCR amplified products were digested with NdeI and HindIII, purified using a Qiagen PCR purification kit, and inserted into the same restriction site of pET28a (Novagen). Chemically competent *E. coli* DH5a cells were transformed with the ligation mixture and plated on LB-agar containing kanamycin (50 µg mL<sup>-1</sup>) to screen for positive clones, which were confirmed by DNA sequencing.

### **Construction of the NeurM- and BeauM-expression plasmids**

The CDS (coding domain sequence) fragments of NeurM and BearM were amplified from the cDNA by using a primer pair *NeurM-F* and *NeurM-R*, and a primer pair *BeauM-F* and *BeauM-R*, respectively. The resulting PCR products were inserted in the NdeI/XhoI restriction site of pET28a (Novagen) by homologous recombination using the One Step Cloning Kit (Vazyme Biotech Co., Ltd). Typically, 20 µL of a mixture containing 4 µL of 5×CE II Buffer, 2 µL of Exnase II, 50-200 ng linear plasmid, 20-200 ng PCR fragment and ddH<sub>2</sub>O was incubated at 37 °C for 30

min, and the resulting solution was used to transform chemically competent *E. coli* DH5 $\alpha$  cells. Colony PCR and sequencing were carried out to confirm the sequence fidelity of the recombinant plasmids.

### **Construction of the PhomM- and MetaM-expression plasmids**

Codon-optimized (for *E. coli*) *phomM* (Sequence I) and *metaM* (Sequence II) were ordered from Genewiz Inc. (Suzhou, China). *phomM* and *metaM* were amplified by PCR using a primer pair *PhomM-F* and *PhomM-R*, and a primer pair *MetaM-F* and *MetaM-R*, respectively. The PCR-amplified products were digested with NdeI and HindIII, purified using a Qiagen PCR purification kit, and inserted into the same restriction site of pET28a (Novagen). Chemically competent *E. coli* DH5 $\alpha$  cells were transformed with the ligation mixture and plated on LB-agar containing kanamycin (50  $\mu\text{g mL}^{-1}$ ) to screen for positive clones, which were confirmed by DNA sequencing.

### **Enzyme overexpression and purification**

Chemically competent *E. coli* BL21 (DE3) cells (for *phomM* and *metaM*) or *E. coli* Rosetta (DE3) cells (for *sahH*, *neurM* and *beauM*) were transformed with each protein-expression construct. A single colony transformant was used to inoculate a 30 mL culture of LB supplemented with 100  $\mu\text{g/mL}$  kanamycin. The culture was grown at 37  $^{\circ}\text{C}$  for 12 h and was used to inoculate 3 L of LB medium containing 100  $\mu\text{g/mL}$  kanamycin. Cells were grown at 37  $^{\circ}\text{C}$  and 220 rpm to an  $\text{OD}_{600} \sim 0.8$ , and were then chilled on ice for 10 min. IPTG was added to the culture to a final concentration of 0.1 mM before additional 15-20 h of incubation at 18  $^{\circ}\text{C}$  and 220 rpm. The cells were harvested by centrifugation at 4000  $\times$  g for 15 min at 4  $^{\circ}\text{C}$ . The pellet was resuspended in 30 mL of start buffer (20 mM Tris, 500 mM NaCl, 1 mM TCEP, 10% glycerol, pH 8.0) and were lysed using a high pressure homogenizer (FB-110X, Shanghai Litu Mechanical Equipment Engineering Co., Ltd, China or JN-02HC, JNBIO, China). Cell debris was removed via centrifugation at 23,800  $\times$  g for 30 min

at 4 °C. The supernatant was passed through a column containing 5 mL of high-affinity Ni-NTA resin (Qiagen Co. Ltd) equilibrated with start buffer, and the column was then washed using 50 mL of wash buffer (20 mM Tris, 500 mM NaCl, 50 mM imidazole, 10% glycerol, pH 8.0). The protein fractions were eluted by using 10 mL of elution buffer (20 mM Tris, 500 mM NaCl, 500 mM imidazole, 10% glycerol, pH 8.0). The desired fractions were combined and concentrated using an Amicon Ultra-15 Centrifugal Filter Unit and analyzed by SDS-PAGE (12% Tris-glycine gel). Protein concentration was determined using a Bradford Assay Kit (Promega) using bovine serum albumin (BSA) as a standard. Protein solution was then subjected to desalting on a DG-10 column (Bio-Rad) pre-equilibrated with the elution buffer (50 mM Tris, 25 mM NaCl, 10 mM DTT and 10% (v/v) glycerol, pH 8.0). The protein fraction was collected and concentrated, and was used directly for in vitro assay or stored at -80 °C until further use.

### **Genome mining for putative dikaritin biosynthetic gene clusters**

The nucleotide and amino acid sequences of putative dikaritin biosynthetic gene clusters were obtained from the National Center for Biotechnology Information (NCBI) sequence database. To identify putative dikaritin biosynthetic gene clusters, BlastP searches were performed using the PhomA, PhomQ, and PhomM protein sequences as different queries. Hits were selected with E-value < 1E-10, 1E-20 and 1E-15, respectively. The genes around the identified hits were inspected, and the gene clusters were recognized as dikaritin biosynthetic gene clusters only when all the proteins listed below were found to be encoded in the gene cluster. These proteins are 1) a PhomA-like protein containing an N-terminal leader peptide and several repeated core/recognition motifs; 2) a PhomQ analogous protein; 3) a methyltransferase (may or may not be homologous to PhomM); 4) multiple DUF3328 proteins; and 5) transporter proteins or peptidases. The sequences of the putative dikaritin precursor peptides and the accession numbers of the gene clusters are summarized in Supplementary Table 2.

## **Phylogenetics**

Bayesian MCMC inference analyses were performed using the program MrBayes (version 3.2) (10). Final analyses consisted of two sets of eight chains each (one cold and seven heated), run for about 2 million generations with trees saved and parameters sampled every 100 generations. Analyses were run to reach a convergence with standard deviation (SD) of split frequencies  $< 0.004$ . Posterior probabilities were averaged over the final 75% of trees (25% burn in).

**Fig. S1** A hypothetical biosynthetic pathway to phomopsin A. The order of the posttranslational modifications is not known and just one sequence is shown here. The tyrosinase PhomQ likely forms the Tyr-Ile crosslink in the precursor peptide PhomA, but the identity of the enzyme(s) responsible for the dehydrogenation reactions is at present still unclear. The S41 family peptidase PhomP1 may excise the core peptides from the precursor peptide. Since both the core peptide and the recognition sequence immediately upstream of the core peptide end in Asp, it is possible that PhomP1 excises the core peptide by cleaving twice. The methyltransferase PhomM necessarily needs to act after the N-terminus of the core peptide is liberated by proteolysis. We have not detected any obvious candidates for the enzymes that need to carry out the chlorination and hydroxylation reactions. These transformations may either be carried out by the ORFs of unknown function in the clusters (including predicted hydroxylase and oxidoreductase proteins) or by proteins encoded outside of the clusters.

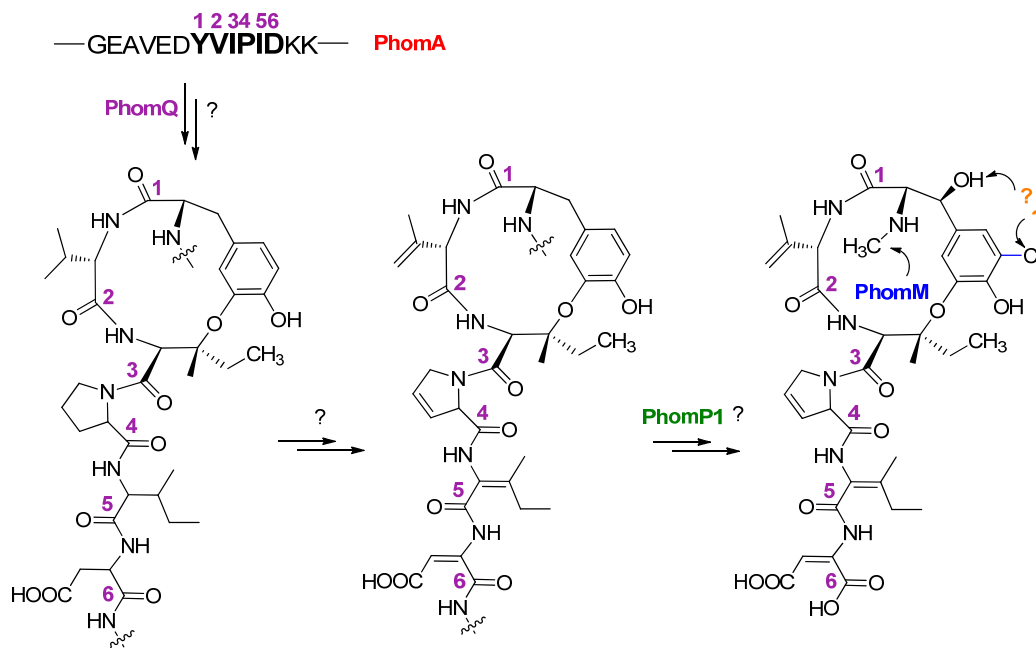



**Fig. S2.** HR-MSMS analysis of phomopsin A, showing its structure and the ion fragments generated upon collision induced dissociation (A), and the MS/MS spectrum (B).

A

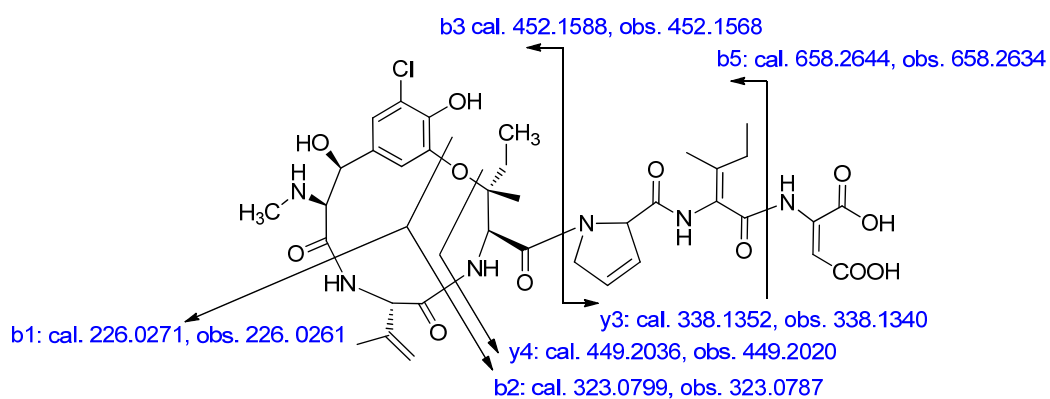

B

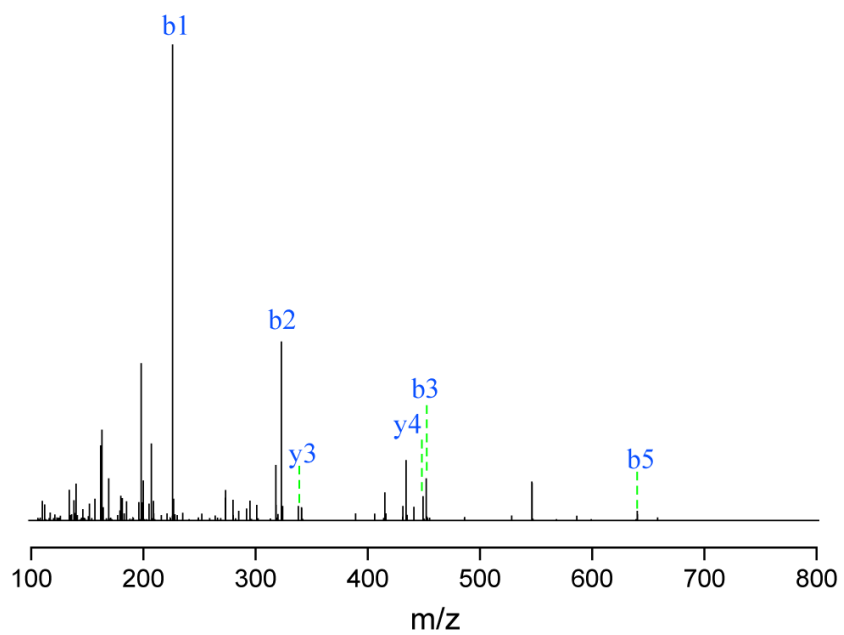

**Fig. S3.** UV-Vis spectrum of phomopsin A.

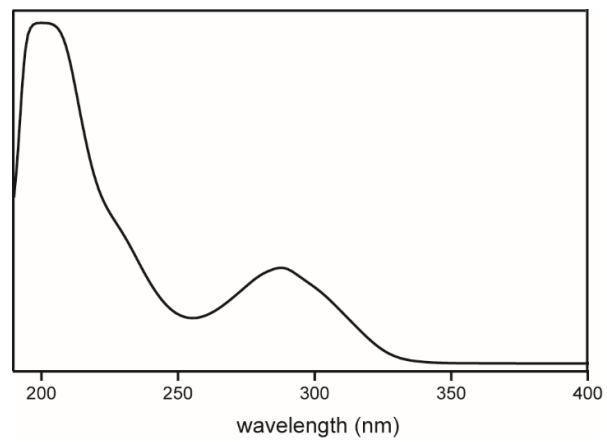

**Fig. S4.**  $^1\text{H}$  NMR spectrum (500 MHz,  $d_6$ -DMSO) of phomopsin A.

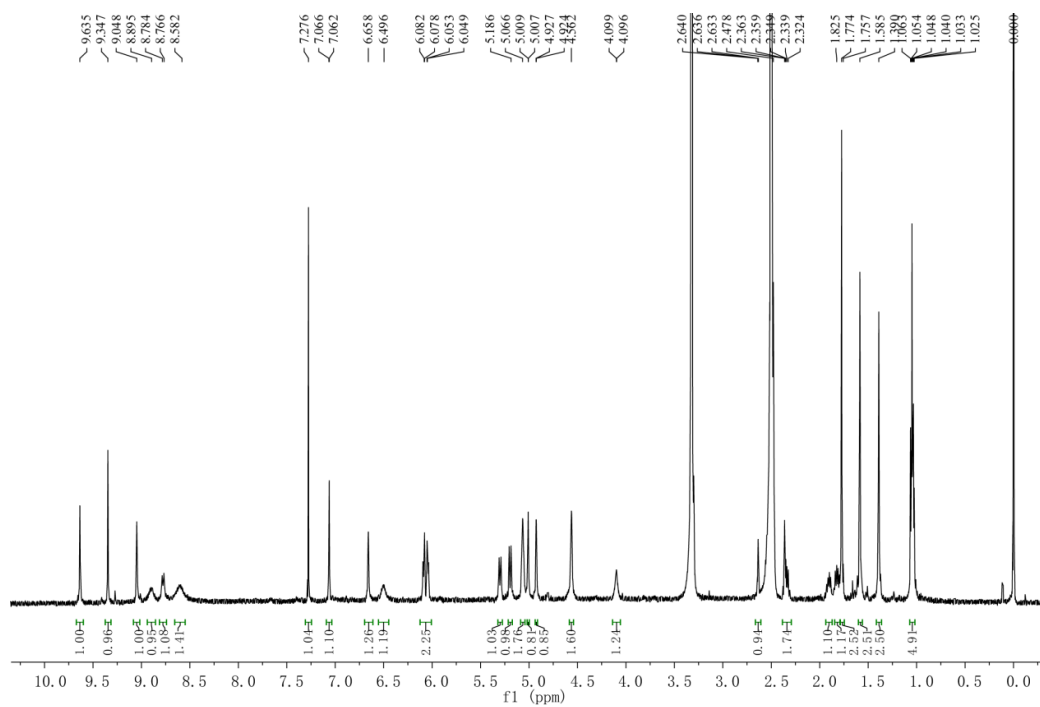

**Fig. S5.**  $^{13}\text{C}$  NMR spectrum (126 MHz,  $\text{d}_6\text{-DMSO}$ ) of phomopsin A.

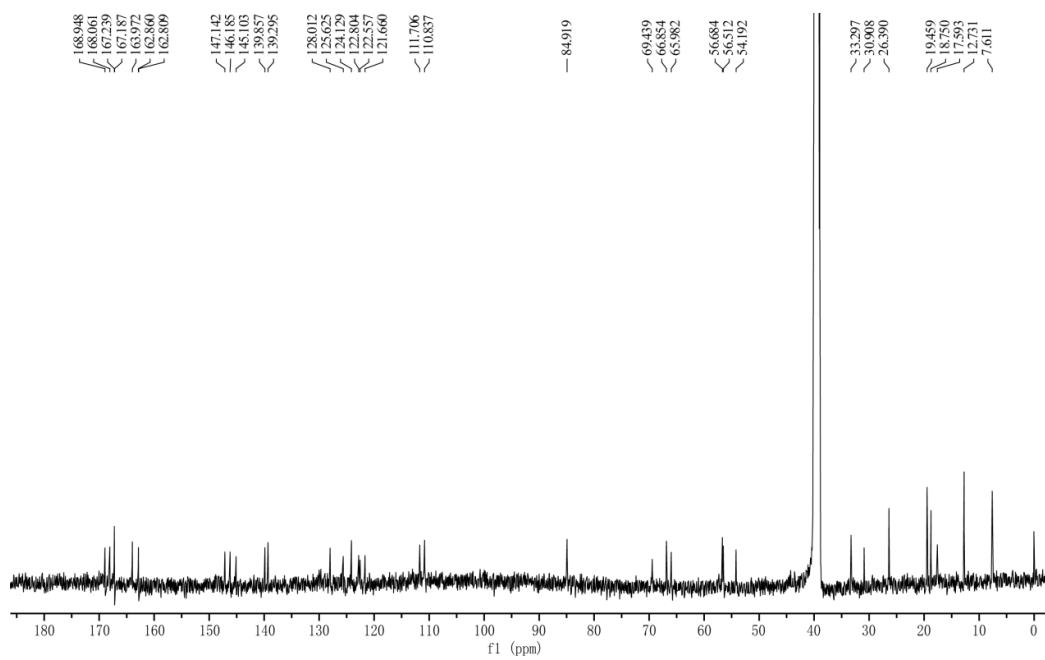

**Fig. S6** gCOSY spectrum (d<sub>6</sub>-DMSO) of phomopsin A.

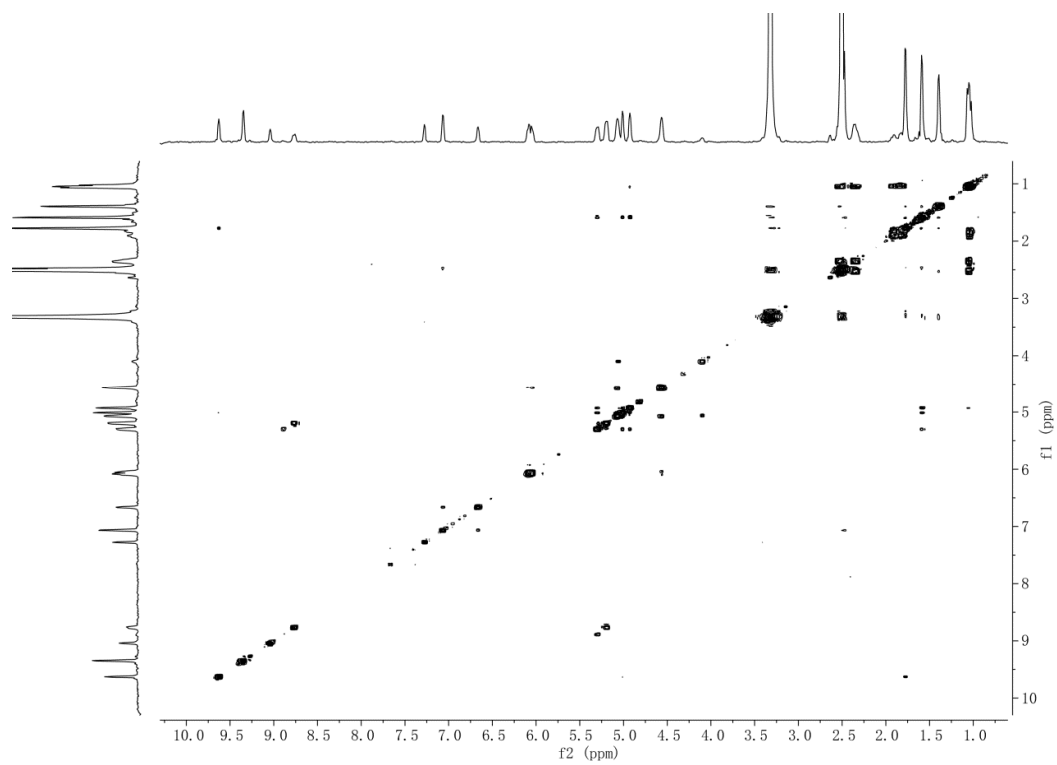

**Fig. S7** HSQC spectrum ( $d_6$ -DMSO) of phomopsin A.

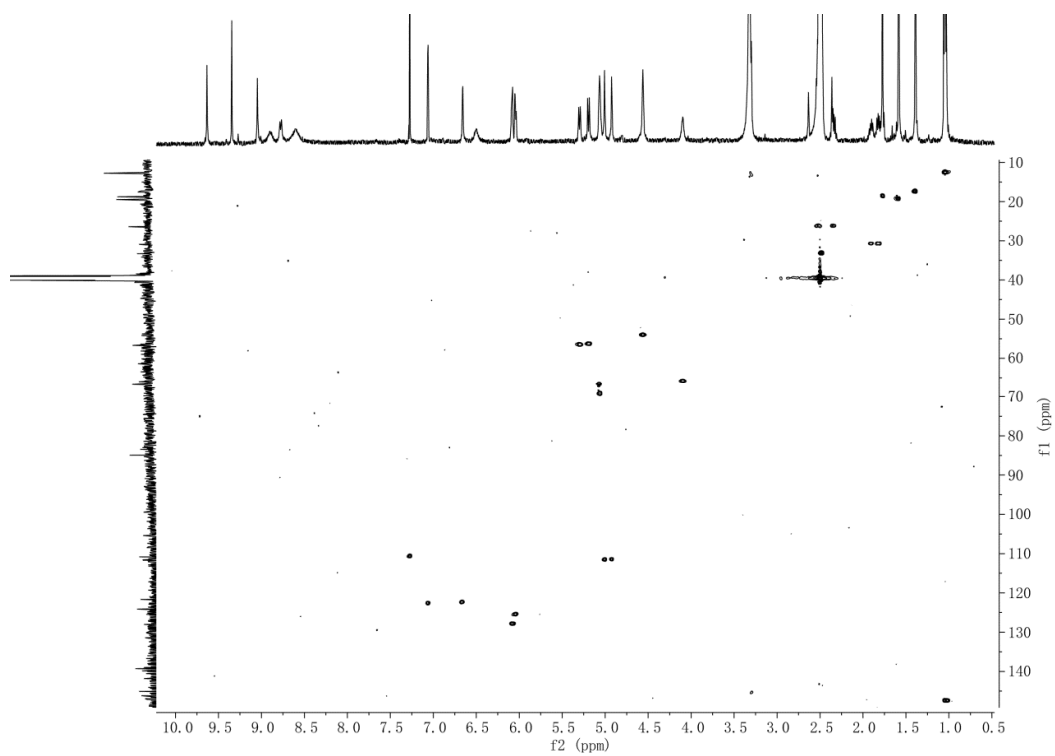

**Fig. S8.** HR-MSMS analysis of phomopsin Q, showing its structure and the ion fragments generated upon collision induced dissociation (A), and the MS/MS spectrum (B). The stereochemistry shown is based on analogy with phomopsin A as well as the ribosomal origin of the precursor peptide.

A

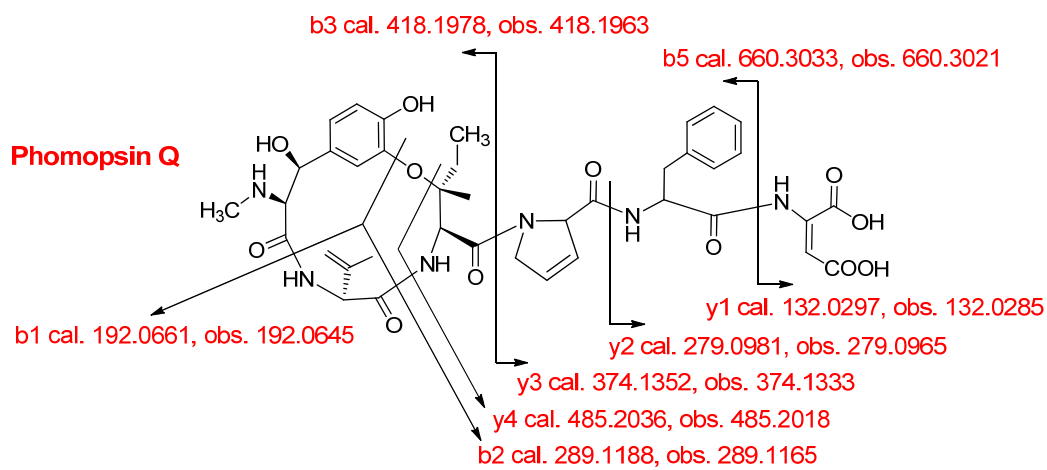

B

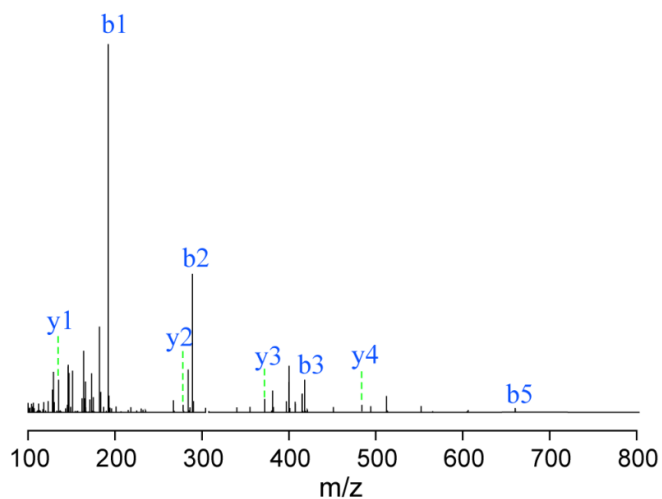

**Fig. S9.** HR-MSMS analysis of phomopsin R, showing its structure and the fragments generated upon collision induced dissociation (A), and the MS/MS spectrum (B).  $b^*$  represents  $[b - 18]^+$  ion, which likely derived from dehydration of the hydroxyl group highlighted in red in panel A. The stereochemistry shown is based on analogy with phomopsin A as well as the ribosomal origin of the precursor peptide.

A

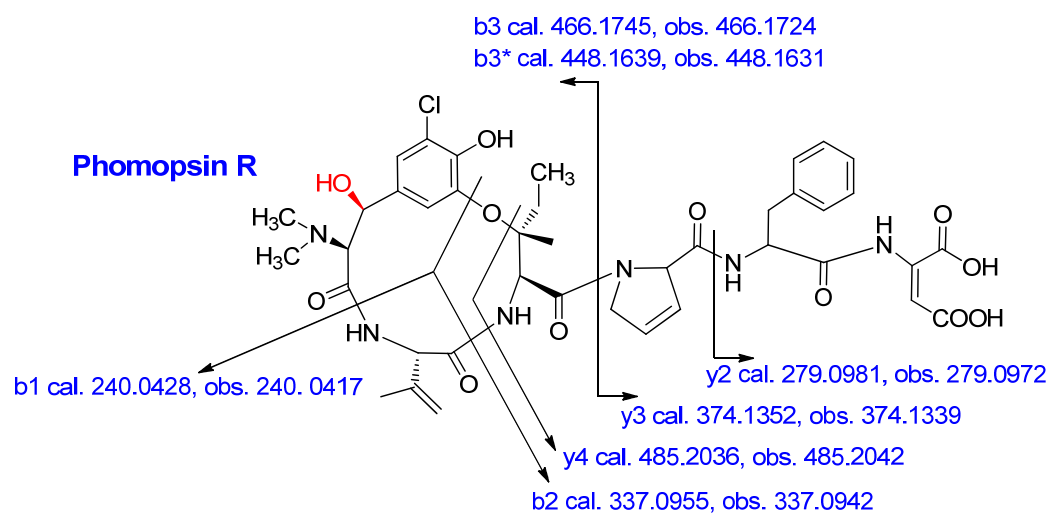

B

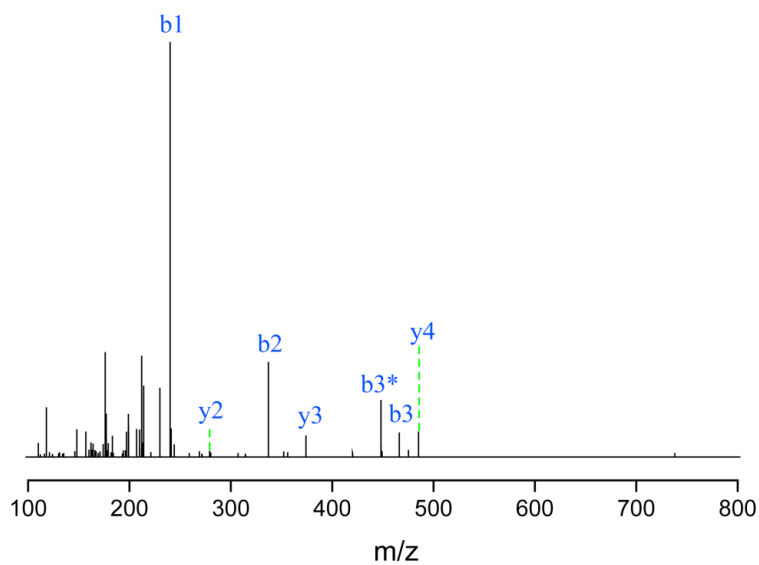



**Fig. S10.** HR-MSMS analysis of metarisin A, showing its structure and the ion fragments generated upon collision induced dissociation (A), and the MS/MS spectrum (B). The stereochemistry shown is based on analogy with phomopsin A as well as the ribosomal origin of the precursor peptide.

A

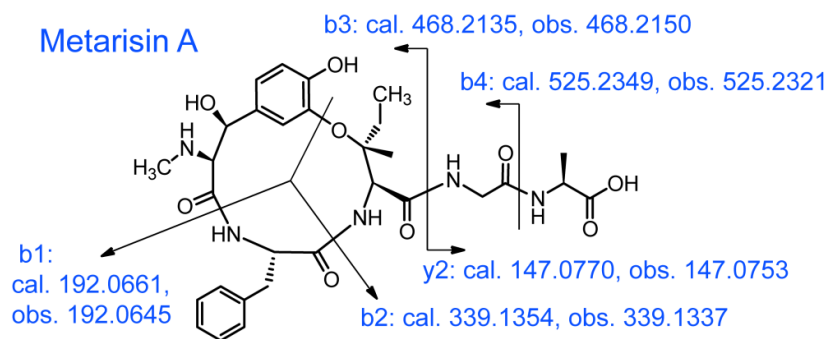

B

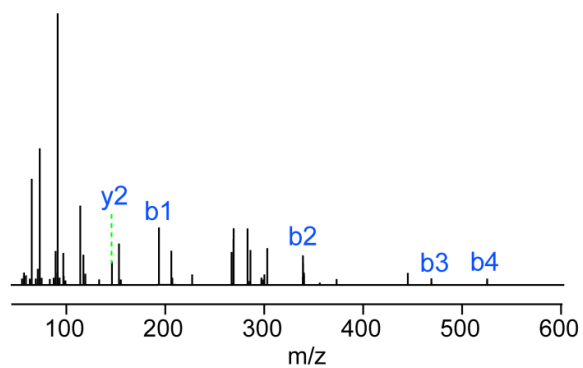

**Fig. S11.** HR-MSMS analysis of metarisin B, showing its structure and the ion fragments generated upon collision induced dissociation (A), and the MS/MS spectrum (B). The stereochemistry shown is based on analogy with phomopsin A as well as the ribosomal origin of the precursor peptide.

A

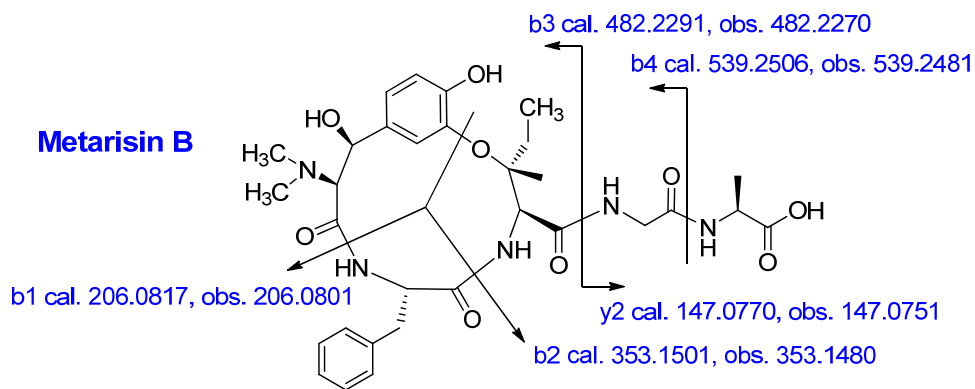

B

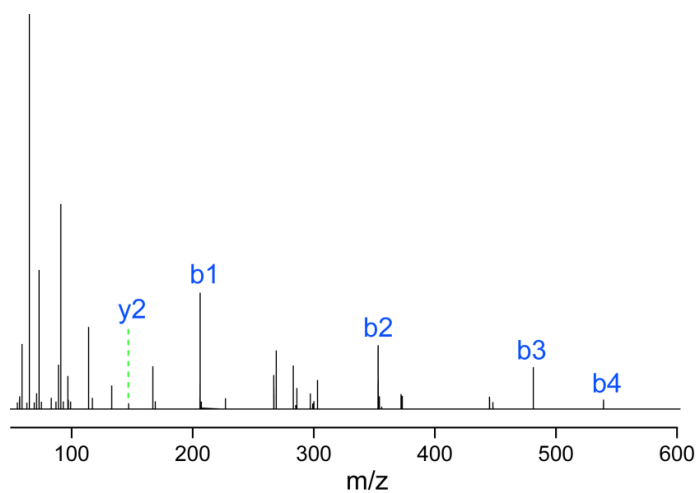

**Fig. S12.** HR-MSMS analysis of ustiloxin G, showing its structure and the ion fragments generated upon collision induced dissociation (A), and the MS/MS spectrum (B). The stereochemistry shown is based on analogy with phomopsin A as well as the ribosomal origin of the precursor peptide.

A

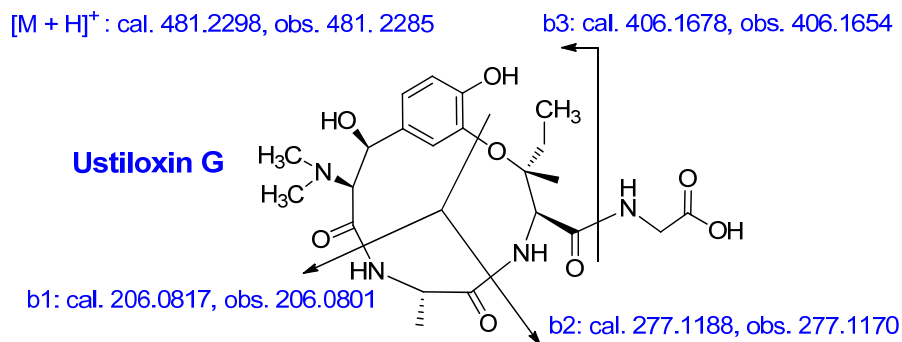

B

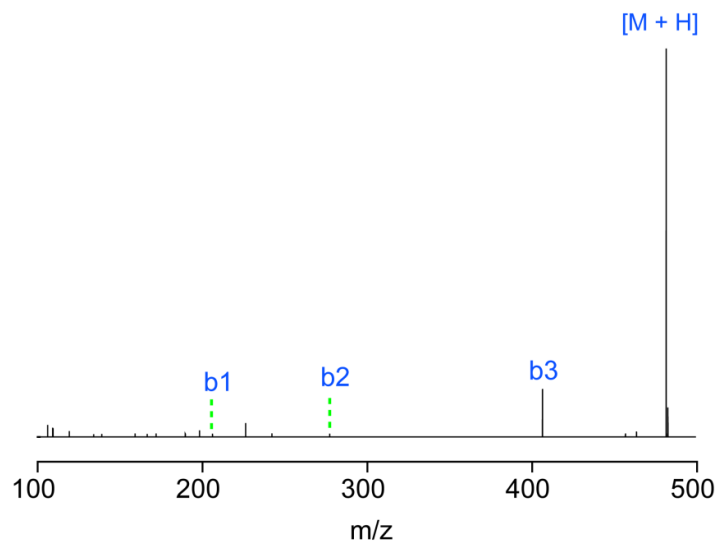

**Fig. S13.** The biosynthetic gene cluster of phomopsin Z from *Beauveria bassiana*, showing the Genbank accession number and the predicted function of each gene. The genes are shown in different colors in a similar way to the *phom* gene cluster shown in Figure 2B in the main text. EJP63461.1 is the precursor peptide to phomopsin Z shown in Figure 4C of the main text.

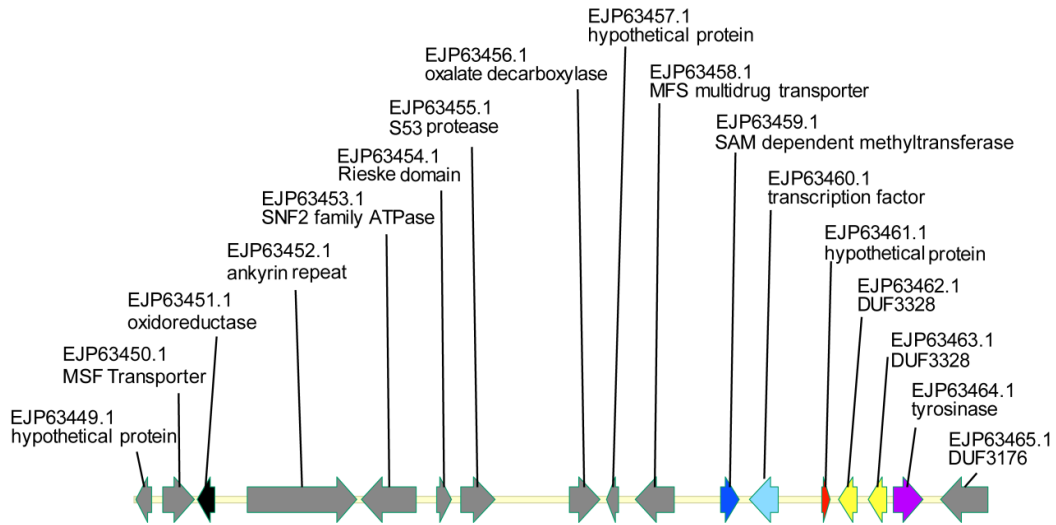



**Fig. S15** HR-LCMS analysis of methyltransferase assay mixtures, showing the extracted ion chromatograms (EICs) of  $m/z$  803.3 (corresponding to phomopsin E) and the corresponding mass spectra of each assay.

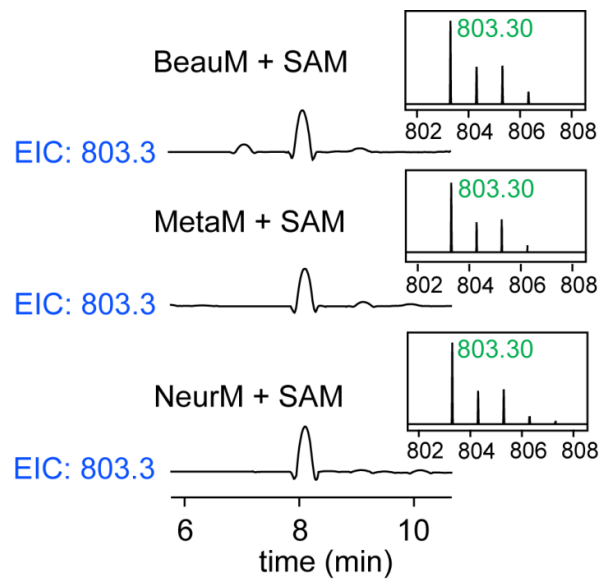

**Table S1.** Analysis of the phomopsin biosynthetic gene cluster using Geneid (3) with *Neurospora crassa* as a reference genome (5) followed by conserved domain analysis (11, 12) at the NCBI website. The size of the proteins is predicted and could be incorrect.

| Predicted gene | Number of amino acids | Putative function            |
|----------------|-----------------------|------------------------------|
| <i>phomC</i>   | 189                   | Cupin family protein         |
| <i>phomD</i>   | 469                   | Zinc Finger protein          |
| <i>phomT</i>   | 595                   | MFS multidrug transporter    |
| <i>phomE</i>   | 396                   | Hydroxylase                  |
| <i>phomF</i>   | 293                   | Oxidoreductase               |
| <i>phomYa</i>  | 121                   | DUF3328 protein              |
| <i>phomP1</i>  | 666                   | Peptidase S41 family protein |
| <i>phomYb</i>  | 251                   | DUF3328 protein              |
| <i>phomA</i>   | 144                   | Precursor peptide            |
| <i>phomR</i>   | 639                   | Transcription Factor         |
| <i>phomO</i>   | 1561                  | ABC transporter              |
| <i>phomM</i>   | 387                   | Methyltransferase            |
| <i>phomB</i>   | 342                   | Hypothetic protein           |
| <i>phomP2</i>  | 842                   | Oligopeptide transporter     |
| <i>phomYc</i>  | 254                   | DUF3328 protein              |
| <i>phomQ</i>   | 378                   | Tyrosinase                   |
| <i>phomYd</i>  | 234                   | DUF3328 protein              |
| <i>phomYe</i>  | 285                   | DUF3328 protein              |
| <i>phomG</i>   | 1213                  | Peptidase                    |

**Table S2.** Putative dikaritin biosynthetic precursor peptides and their associated gene clusters.

| Accession Number*                                                     | Length/repeats | Sequence<br>Repeated core sequences are highlighted in yellow<br>Deviations from the ED-YXIXX(D/N)-KR motif are highlighted in blue                                                                                                                                                              |
|-----------------------------------------------------------------------|----------------|--------------------------------------------------------------------------------------------------------------------------------------------------------------------------------------------------------------------------------------------------------------------------------------------------|
| Gene cluster: CM001199.1 from <i>Zyoseptoria tritici</i> IPO323       |                |                                                                                                                                                                                                                                                                                                  |
| EGP88004.1                                                            | 196/9          | MHTSSATWALFALSCTGALSAPIFNPPPLPALAPRHEAVTAVEDYLDKT<br>KRAEAVEDYVIPVDKT KRAEAVEDYVIPVDKT KRAEAVEDYVIPVDKT<br>KRAEAVEDYVIPVDKT KRAEAVEDYVIPVDKT KRAEAVEDYVIPVDKT<br>KRAEAVEDYVIPVDKT KRAEAVEDYVIPVDKT KRAEAVEDYVIPVDKT<br>KRA                                                                       |
| Gene cluster: ANFO01000810.1 from <i>Beauveria bassiana</i> D1-5      |                |                                                                                                                                                                                                                                                                                                  |
| KGQ06486.1                                                            | 131/6          | MKLSFISVLAAGVAIAAPTPPDNAIEDYVISVNRKSDAIEDYAIIPVNRKRG<br>DAIEDYAIIPVNRKRGDAIEDYAIIPVNRKSDAIEDYAIIPVNRKRGDAVEDYA<br>IPVNRKRGDAIEDYAIIPVNRKRGDAIEDYVISVN                                                                                                                                            |
| Gene cluster: GL891218.1 from <i>Neurospora tetrasperma</i> FGSC 2509 |                |                                                                                                                                                                                                                                                                                                  |
| EGZ72581.1                                                            | 162/6          | MKYSSSILIAAFCVSVLAAPAAKRSSVEDYVIEVDKRSSVEDKRSSVED<br>YVISVDNRSSVEDYAIIGVDKRGAVEDKRSAVEDYVIEVDKRHNSVED<br>YAIIGVDKRGSVEDKRSAVEDYVIEVDKRHNSVEDYAIIGVDKRGSVED                                                                                                                                       |
| Gene cluster: KN389650.1 from <i>Neurospora crassa</i>                |                |                                                                                                                                                                                                                                                                                                  |
| KHE86654.1                                                            | 197/8          | MKYSSSILIAAFCVSVLAAPAAKRSSVEDYVIEVDKRSSVEDKRGAVED<br>KRHNSVEDYVIAVDRRGSVEDKRSSVEDYVISVDNRSSVEDYAIIGVD<br>KRGAVEDYVIEVDKRHNSVEDYAIIGVDKRGAVEDKRGAVEDKRHNSV<br>EDYAIIGVDKRGAVEDYVIEVDKA                                                                                                            |
| Gene cluster: CM002242.1 from <i>Neurospora crassa</i> OR74A          |                |                                                                                                                                                                                                                                                                                                  |
| EAA30507.1                                                            | 238/10         | MKYSSSILIAAFCVSVLAAPAAKRSSVEDYVIEVDKRSSVEDKRGAVED<br>KRHNSVEDYVIAVDRRGSVEDKRSSVEDYVISVDNRSSVEDYAIIGVD<br>KRGAVEDYVIEVDKRHNSVEDYAIIGVDKRGAVEDKRGAVEDKRHNSV<br>EDYAIIGVDKRGAVEDYVIEVDKRHGGVEDYAIIGVDKRGSVEDKRHNS<br>VEDYVIEVDKA                                                                    |
| Gene cluster: GL891306.1 from <i>Neurospora tetrasperma</i> FGSC 2508 |                |                                                                                                                                                                                                                                                                                                  |
| EGO55879.1                                                            | 223/9          | MKYSSSILIAAFCVSVLAAPAAKRSSVEDYVIEVDKRSSVEDKRSSVED<br>YVISVDNRSSVEDYAIIGVDKRGAVEDKRSAVEDYVIEVDKRHNSVED<br>YAIIGVDKRGSVEDKRSAVEDYVIEVDKRHNSVEDYAIIGVDKRGSVED<br>KRSAVEDYVIEVDKRHNSVEDYAIIGVDKRGSVEDKRSAVEDYVIEVDK<br>A                                                                             |
| Gene cluster: JZEE01000032.1 from <i>Aspergillus parasiticus</i> SU-1 |                |                                                                                                                                                                                                                                                                                                  |
| KJK68632.1                                                            | 253/17         | MKMLTLLVSGLCALAAPTAKRDGIEDYAIIGIDKRNSVEDYAIIGIDKRN<br>SVEDYAIIGIDKRNSVEDYAIIGIDKRGGSVEDYAIIGIDKRGGSVEDYAIIGI<br>DKRGGSVEDYAIIGIDKRNSVEDYAIIGIDKRNSVEDYAIIGIDKRNSVED<br>YAIIGIDKRNSVEDYAIIGIDKRNSVEDYAIIGIDKRNSVEDYAIIGIDKRNSV<br>EDYAIIGIDKRNSVEDYAIIGIDKRGSVEDYAIIGIDKRGGSVED<br>DYAIIGIDKRHGGH |
| Gene cluster: AP007166.1 from <i>Aspergillus oryzae</i> RIB40         |                |                                                                                                                                                                                                                                                                                                  |
| BAE63088.1                                                            | 224/15         | MKLILTLLVSGLCALAAPAAKRSDGVEDYAIIGIDKRNSVEDYAIIGIDKRN<br>SVEDYAIIGIDKRNSVEDYAIIGIDKRNTVEDYAIIGIDKRNSVEDYAIIGIDK<br>RNTVEDYAIIGIDKRNSVEDYAIIGIDKRNSVEDYAIIGIDKRGGSVEDYAI<br>GIDKRNSVEDYAIIGIDKRNSVEDYAIIGIDKRGSVEDYAIIGIDKKRGTVE<br>DYAIIGIDKRGGSVEDYAIIGIDKRHGGH                                  |
| Gene cluster: JHTR01000063.1 from <i>Ustilaginoidea virens</i>        |                |                                                                                                                                                                                                                                                                                                  |
| KDB11630.1                                                            | 134/7          | MKFLSILISLATGFPAAVVAAPTQENVMKRASVEDYAIIGVDKRDAVE<br>DYVIGVDKRDAVEDYVIGVDKRDAVEDYVIGVDKRDAVEDYAIIGVDK<br>RDAVEDYVIGVDKRDAVEDYVIGVDKRDAVEDYAIIGVNRK                                                                                                                                                |
| Gene cluster: JH725175.1 from <i>Beauveria bassiana</i> ARSEF 2860    |                |                                                                                                                                                                                                                                                                                                  |
| EJP63461.1                                                            | 113/7          | MKLSFISVLAAGVAIAAPTPPDNAIEDYVISVNRKSDAIEDYAIIPVNRKRG<br>DAIEDYAIIPVNRKSDAIEDYVISVNRKDDYAIIPVNRKSDAIEDYAIIPVNRK<br>RGDAVEDYVISVN                                                                                                                                                                  |

Gene cluster: AKHY01000126.1 from *Aspergillus oryzae* 3.042



|                                                                              |        |                                                                                                                                                                                                                                                                                                                                                                                                                                                                                                                                                                                                                                  |
|------------------------------------------------------------------------------|--------|----------------------------------------------------------------------------------------------------------------------------------------------------------------------------------------------------------------------------------------------------------------------------------------------------------------------------------------------------------------------------------------------------------------------------------------------------------------------------------------------------------------------------------------------------------------------------------------------------------------------------------|
| EIT79501.1                                                                   | 127/7  | MKLILTLVSLCALAAPAAKVSksYLIQRDGVED <b>YAIgID</b> KRNSVED <b>YAIgID</b> KRNSVED <b>YAIgID</b> KRNSVED <b>YAIgID</b> KRNSVED <b>YAIgID</b> KRGGSVED <b>YAIgID</b> KRGGSVED <b>YAIgID</b> KRHGGH                                                                                                                                                                                                                                                                                                                                                                                                                                     |
| Gene cluster: : CABT02000031.1 from <i>Sordaria macrospora</i> k-hell        |        |                                                                                                                                                                                                                                                                                                                                                                                                                                                                                                                                                                                                                                  |
| CCC12843.1                                                                   | 101/5  | MKYSSSVLIAAFVSVLAAPVAKSNAVED <b>YVIPID</b> KRSSVED <b>YVIPID</b> KRGSVED <b>YVIPID</b> KRSSVED <b>YVIPID</b> KRNGAVED <b>YAIPID</b> KAQLRRGLCDPDR                                                                                                                                                                                                                                                                                                                                                                                                                                                                                |
| Gene cluster: : JYNM01000637.1 from <i>Penicillium solitum</i>               |        |                                                                                                                                                                                                                                                                                                                                                                                                                                                                                                                                                                                                                                  |
| KJJ13508.1                                                                   | 469/10 | MEGVTNAVYNNAGRGRNGRNVVEVTEMAEVVTTAVTTTTSSNPTS<br>CLHTTSQCVTKSRETISIESPPVPISQEATATTAPIPNRYHDPQEKRLAVE<br>YGKRDRDIRRAAARAKAKETGGNKLTEGGGQGFAGPGERAMAVTGD<br>VTTIVTIDSSTDSTHWDSETSNDVTADEIMTMDRVDDELFLHDGEP<br>LHAMDVELPSTYNQAMRDQWYDAMRQLDDLAAGTWSLIRKPPKAK<br>VLPGWRLTLKTNPSDYVYSFKARWVVCGNFQRIGLLLKFNNLFFRL<br>NLQKRAKMKLTMISILAPCLSTLVLAAPAIQERAMAKRGVED <b>YAIgVD</b><br>KRNVED <b>YAIpVD</b> KRGSVED <b>YAIgVD</b> KRNVED <b>YAIgVD</b> KRGSVED <b>YAIgVD</b><br><b>VD</b> KRGSVED <b>YAIgVD</b> KRNVED <b>YAIpVD</b> KRGSVED <b>YAIgVD</b> KRNVED <b>YAIgVD</b><br>AIPADKRGSVED <b>YAIgVD</b> KRGVED <b>YAIgVD</b> KRHGNHGAV |
| Gene cluster:DF952562.1 from <i>Ustilaginoidea virens</i>                    |        |                                                                                                                                                                                                                                                                                                                                                                                                                                                                                                                                                                                                                                  |
| GAO17429.1                                                                   | 121/7  | MKFLSILATGFPAAVVAAPTQENVMKRASVED <b>YAIgVD</b> KRDAVED <b>YVIGVD</b> KRDAVED <b>YVIGVD</b> KRDAVED <b>YVIGVD</b> KRDAVED <b>YAIgVD</b> KRDAVED <b>YVIGVD</b> KRDAVED <b>YAIgVnK</b>                                                                                                                                                                                                                                                                                                                                                                                                                                              |
| Gene cluster: ADNJ02000002.1 from <i>Metarhizium robertsii</i> ARSEF 23      |        |                                                                                                                                                                                                                                                                                                                                                                                                                                                                                                                                                                                                                                  |
| EFY98885.1                                                                   | 132/8  | MKFSTAIVVTA VAVGAAAAPTQKTVED <b>YFIGAD</b> KRDKTVED <b>YFIGAD</b><br>KRDKTVED <b>YFIGAD</b> KRDKTVED <b>YFIGAD</b> KRDKTVED <b>YFIGAD</b> KRDKT<br>ED <b>YFIGAD</b> KRDKTVED <b>YFIGAD</b> KRDKTVED <b>YFIGAD</b>                                                                                                                                                                                                                                                                                                                                                                                                                |
| Gene cluster:KE384738.1 from <i>Metarhizium anisopliae</i> BRIP 53293        |        |                                                                                                                                                                                                                                                                                                                                                                                                                                                                                                                                                                                                                                  |
| KJK77431.1                                                                   | 132/8  | MKFSTAIVVTA VAVGAAAAPTQKTVED <b>YFIGAD</b> KRDKTVED <b>YFIGAD</b><br>KRDKTVED <b>YFIGAD</b> KRDKTVED <b>YFIGAD</b> KRDKTVED <b>YFIGAD</b> KRDKT<br>ED <b>YFIGAE</b> KRDKTVED <b>YFIGAD</b> KRDKTVED <b>YFIGAD</b>                                                                                                                                                                                                                                                                                                                                                                                                                |
| Gene cluster:JNNZ01000019.1 from <i>Metarhizium anisopliae</i>               |        |                                                                                                                                                                                                                                                                                                                                                                                                                                                                                                                                                                                                                                  |
| KFG86213.1                                                                   | 118/7  | MKFSTAIVVTA VAVGAAAAPTQKTVED <b>YFIGAD</b> KRDKTVED <b>YFIGAD</b><br>KRDKTVED <b>YFIGAD</b> KQDKTVED <b>YFIGAD</b> KRDKTVED <b>YFIGAD</b> KQDKT<br>VED <b>YFIGAD</b> KRDKTVED <b>YFIGAD</b>                                                                                                                                                                                                                                                                                                                                                                                                                                      |
| Gene cluster:CACQ02004680.1 from <i>Colletotrichum higginsianum</i>          |        |                                                                                                                                                                                                                                                                                                                                                                                                                                                                                                                                                                                                                                  |
| CCF41414.1                                                                   | 98/4   | MKAFDIAFVLAFAAGALAMPTQGGHLATTGEAQGGIENSNGNPVED <b>YVIPID</b> KRDEAPVED <b>YVIPID</b> KRDEAPVED <b>YVIPID</b> KRDEAPVED <b>YVIPID</b> K                                                                                                                                                                                                                                                                                                                                                                                                                                                                                           |
| Gene cluster:GG697444.1 from <i>Colletotrichum graminicola</i> M1.001        |        |                                                                                                                                                                                                                                                                                                                                                                                                                                                                                                                                                                                                                                  |
| EFQ36603.1                                                                   | 116/5  | MQIMKVSEISFVLAVALAALPAQGENSLMARKSGGEMAKGDGPV<br>VD <b>YVIPID</b> KRDKDPVVD <b>YVIPID</b> KRDDDVPVVD <b>YVIPID</b> KRNEGPVVD <b>YVIPID</b><br><b>IPID</b> KRDEDPVVD <b>YVIPID</b> K                                                                                                                                                                                                                                                                                                                                                                                                                                               |
| Gene cluster: KB020750.1 from <i>Colletotrichum gloeosporioides</i> Nara gc5 |        |                                                                                                                                                                                                                                                                                                                                                                                                                                                                                                                                                                                                                                  |
| ELA31405.1                                                                   | 121/5  | MKLSSVTA VLAFAVISSLALPNMSINNGLVERDGDEAVASGESSPATD <b>YVIPID</b><br><b>IPID</b> KRDESPATD <b>YVIPID</b> KRDENPATD <b>YVIPID</b> KRDDSPATD <b>YVIPID</b> KR<br>EDSADDGGNSPATD <b>YVIPID</b> K                                                                                                                                                                                                                                                                                                                                                                                                                                      |
| Gene cluster:AZNH01000104.1 from <i>Metarhizium guizhouense</i> ARSEF 977    |        |                                                                                                                                                                                                                                                                                                                                                                                                                                                                                                                                                                                                                                  |
| KID82083.1                                                                   | 118/7  | MKFSTAIVVTA VAVGAAAAPTQKTVED <b>YFIGAD</b> KRDKTVED <b>YFIGAD</b><br>KRDKTVED <b>YFIGAD</b> KRDKTVED <b>YFIGAE</b> KRDKTVED <b>YFIGAD</b> KRDKT<br>ED <b>YFIGAD</b> KRDKTVED <b>YFIGAD</b>                                                                                                                                                                                                                                                                                                                                                                                                                                       |
| Gene cluster:KE652192.1 from <i>Ophiocordyceps sinensis</i> CO18             |        |                                                                                                                                                                                                                                                                                                                                                                                                                                                                                                                                                                                                                                  |
| EQL03795.1                                                                   | 104/6  | MRFSVTFIIGALAVCSNAAPTQGMVSVED <b>YTIGPD</b> KRGMVSVED <b>YTIGPEK</b><br>RSKTVED <b>YTIGPEK</b> RGMSVED <b>YTIGPEK</b> RSKTVED <b>YTIGPD</b> KRGMVSVED<br><b>YTIGPV</b>                                                                                                                                                                                                                                                                                                                                                                                                                                                           |
| Gene cluster:AZNE01000003.1 from <i>Metarhizium majus</i> ARSEF 297          |        |                                                                                                                                                                                                                                                                                                                                                                                                                                                                                                                                                                                                                                  |
| KIE02816.1                                                                   | 104/6  | MKFSTAIVMTALAVGAAAAAPTQKTVED <b>YFIGAD</b> KRDKTVED <b>YFIGAD</b><br><b>D</b> KRDKTVED <b>YFIGAD</b> KRDKTVED <b>YFIGAD</b> KRDKTVED <b>YFIGAD</b> KRDKT<br>VED <b>YFIGAD</b>                                                                                                                                                                                                                                                                                                                                                                                                                                                    |
| Gene cluster:AZNG01000001.1 from <i>Metarhizium brunneum</i> ARSEF 3297      |        |                                                                                                                                                                                                                                                                                                                                                                                                                                                                                                                                                                                                                                  |
| KID79822.1                                                                   | 104/6  | MKFSTAIVVTA VAVGAAAAPTQKTVED <b>YFIGAD</b> KRDKTVED <b>YFIGAD</b>                                                                                                                                                                                                                                                                                                                                                                                                                                                                                                                                                                |

KRDKTVEDYFIGADKRDKTVEDYFIGAEKRDKTVEDYFIGADKRDKTV  
EDYFIGAD

---

|                                                                               |       |                                                                                                                                    |
|-------------------------------------------------------------------------------|-------|------------------------------------------------------------------------------------------------------------------------------------|
| Gene cluster: AMYD01004223.1 from <i>Colletotrichum gloeosporioides</i> Cg-14 |       |                                                                                                                                    |
| EQB43629.1                                                                    | 122/5 | MKLSCVTAVLAFVAGSLALPNMPINNVLVERDGGEGVASGESSPATDYV<br>IPIDKRDDSPDTDYVIPIDKRDEKPADTYVIPIDKRDDSPATDYVIPIDKRE<br>EPGADPGGDSPATDYVIPIDK |
| <hr/>                                                                         |       |                                                                                                                                    |
| Gene cluster: : KB446559.1 from <i>Pseudocercospora fijiensis</i> CIRAD86     |       |                                                                                                                                    |
| EME81786.1                                                                    | 87/3  | MHKNYAAWLLIALSSGAFGAAIGLAPIIARVDKRAEAVEDYIIPIDKRHG<br>AEAIEKRHGAEAVEDYIIPIDKRHGAEAVDDYIIPID                                        |
| <hr/>                                                                         |       |                                                                                                                                    |
| Gene cluster: : KB725822.1 from <i>Colletotrichum orbiculare</i> MAFF 240422  |       |                                                                                                                                    |
| ENH84133.1                                                                    | 121/4 | MKFSGITTFLALATGTLALPTLSINNNLVGRDGGEGVAVGENNPATDY<br>VIPIDKRQEPTDPTGGSPATDYVIPIDKRDDPAQPAGESPATDYVIPIDKRQ<br>EPTDPTGGNPATDYVIPIDK   |

---

\* The accession number for the gene cluster denotes the genome scaffold sequence that contains the full or partial gene cluster.

**Table S3.** PCR primers used in this study.

| Primer     | Sequence*                                                              | Function                                 |
|------------|------------------------------------------------------------------------|------------------------------------------|
| Rt-phomA-F | GGACTATGTGATCCCTATTGAC                                                 | Transcriptional analysis of <i>phomA</i> |
| Rt-phomA-R | GGGATCACATAGTCCTCAACAGC                                                | Transcriptional analysis of <i>phomA</i> |
| Rt-phomM-F | CACCGTCACCCCGGGGTCC                                                    | Transcriptional analysis of <i>phomM</i> |
| Rt-phomM-R | GAAGAGGTCGGCCACGGACTGC                                                 | Transcriptional analysis of <i>phomM</i> |
| Rt-phomQ-F | GTGGGGCGGCTGTACCAGGTC                                                  | Transcriptional analysis of <i>phomQ</i> |
| Rt-phomQ-R | CCCCCATCGGCATCACATCC                                                   | Transcriptional analysis of <i>phomQ</i> |
| trpC-F     | ATGCCAGTTGTTCCAGTGATCTTCGT                                             | <i>trpC</i> sublone                      |
| trpC-R     | AAGAAGGATTACCTCTAAACAAGTG                                              | <i>trpC</i> sublone                      |
| re-trpC-F  | CTATGACCATGATTACGAATTCATGCCAGTTGTTCCAGTGATCTTCGT                       | <i>trpC</i> cloning                      |
| re-trpC-R  | CTCTAGAGGATCCCCGGGTACCAAAGAAGGATTACCTCTAAACAAGTG                       | <i>trpC</i> cloning                      |
| hgh-F      | GATTCAATCTGACTTACCTATTCTACCCAAGCCTCGATCATGAA<br>AAAGCCTGAACTCACCGCGACG | pQZ101 construction                      |
| hgh-R      | AACGCGTTTTATCTTGTGACATGGAGCTATTAATCACTATTC<br>CTTTGCCCTCGGACGAGTGCTG   | pQZ101 construction                      |
| phomQ-F    | AAAGGATCCTCCGAGACTTCGTGCCCTTCATGG                                      | <i>phomM</i> disruption                  |
| phomQ-R    | AAAAAGCTTCCTGCCATGGCACC GCATGTATC                                      | <i>phomM</i> disruption                  |
| id-hph-F   | CCGACGCCCCAGCACTCGTCCGAGGGC                                            | $\Delta$ <i>phomQ</i> verification       |
| id-phomQ-R | CCGGAAGCTACTCCCACTACGCGGCATC                                           | $\Delta$ <i>phomQ</i> verification       |
| NeurM-F    | CCGCGCGGCAGCCATATGGATGATGATGATAAAATGGCCATCCC<br>AGGAATGGACTC           | <i>neurM</i> expression                  |
| NeurM-R    | GGTGGTGGTGGTCTCGACTACTCCAAC TCAAACACC                                  | <i>neurM</i> expression                  |
| BeauM-F    | CCGCGCGGCAGCCATATGGATGATGATGATAAAATGGGATTAGA<br>AAACGTCAAACCG          | <i>BeauM</i> expression                  |
| BeauM-R    | GGTGGTGGTGGTCTCGATCAATACTTGTAGCACAGAAAGCC                              | <i>BeauM</i> expression                  |
| PhomM-F    | AAACATATGCTTCTGTTACCATCACCTCTG                                         | <i>PhomM</i> expression                  |

| Primer  | Sequence*                                        | Function                |
|---------|--------------------------------------------------|-------------------------|
| PhomM-R | AAAA <u>AAGCTT</u> AACGTTCCAGTTCAGCCCACCAAACG    | <i>PhomM</i> expression |
| MetaM-F | AAAC <u>CATATG</u> CAGTCTCCGGTAAAATCCACACC       | <i>MetaM</i> expression |
| MetaM-R | AAAA <u>AAGCTT</u> AGTCTTTGGTACGCTGAGCAAC        | <i>MetaM</i> expression |
| SahH-F  | AAAA <u>CATATG</u> ACGACTGTCGACAACCGACAGGACTTC   | <i>SahH</i> expression  |
| SahH-R  | AAAAA <u>AAGCTT</u> CAGTAGCGGTAGTGGTCCGCCTTGAGGG | <i>SahH</i> expression  |

\*Restriction sites for KpnI (GGTACC), EcoRI (GAATTC), BamHI (GGATCC), HindIII (AAGCTT), NdeI (CATATG), are underlined.

**Table S4.** Assignment of  $^1\text{H}$  and  $^{13}\text{C}$  NMR spectra of phomopsin A.

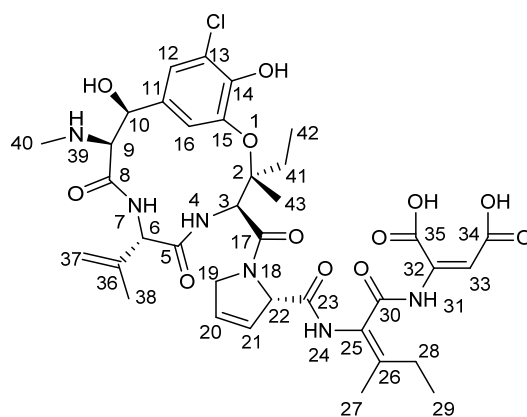

| Position | $^{13}\text{C}(\delta)$ | $^1\text{H}(\delta)$            |
|----------|-------------------------|---------------------------------|
| 1        |                         |                                 |
| 2        | 84.92                   |                                 |
| 3        | 56.51                   | 5.194 (d, 1H, $J = 9.5$ Hz, CH) |
| 4        |                         | 8.582 (brs, 1H, NH)             |
| 5        | 168.95                  |                                 |
| 6        | 56.68                   | 5.299 (d, 1H, $J = 9.5$ Hz, CH) |
| 7        |                         | 8.895 (brs, 1H, NH)             |
| 8        | 162.81                  |                                 |
| 9        | 65.98                   | 4.097 (d, 1H, $J = 1.5$ Hz, CH) |
| 10       | 69.44                   | 5.066 (s, 1H, CH)               |
| 11       | 125.63                  |                                 |
| 12       | 122.80                  | 7.064 (d, 1H, $J = 2.0$ Hz, CH) |
| 13       | 121.66                  |                                 |
| 14       | 147.14                  | 9.048 (s, 1H, OH)               |
| 15       | 145.10                  |                                 |
| 16       | 122.56                  | 6.659 (s, 1H, CH)               |
| 17       | 167.19                  |                                 |
| 18       |                         |                                 |
| 19       | 54.19                   | 4.562 (s, 2H, $\text{CH}_2$ )   |
| 20       | 125.63                  | 6.035-6.042 (m, 1H, CH)         |
| 21       | 128.01                  | 6.078-6.095 (m, 1H, CH)         |
| 22       | 66.85                   | 5.066 (s, 1H, CH)               |
| 23       | 168.06                  |                                 |
| 24       |                         | 9.635 (s, 1H, NH)               |
| 25       | 146.19                  |                                 |
| 26       | 124.13                  |                                 |
| 27       | 18.75                   | 1.774 (s, 3H, $\text{CH}_3$ )   |

|    |        |                                                                                                          |
|----|--------|----------------------------------------------------------------------------------------------------------|
| 28 | 26.39  | 2.324-2.363 (m, 1H, CH <sub>2a</sub> ), 2.515-2.545 (m, 1H, CH <sub>2b</sub> )                           |
| 29 | 7.61   | 1.048 (t, 3H, <i>J</i> = 7.5 Hz, CH <sub>3</sub> )                                                       |
| 30 | 162.86 |                                                                                                          |
| 31 |        | 9.347 (s, 1H, NH)                                                                                        |
| 32 | 139.29 |                                                                                                          |
| 33 | 110.84 | 7.276 (s, 1H, CH)                                                                                        |
| 34 | 167.24 |                                                                                                          |
| 35 | 163.97 |                                                                                                          |
| 36 | 139.86 |                                                                                                          |
| 37 | 111.71 | 4.925 (d, 1H, <i>J</i> = 1.5 Hz, CH <sub>2a</sub> ), 5.008 (d, 1H, <i>J</i> = 1.5 Hz, CH <sub>2b</sub> ) |
| 38 | 19.46  | 1.585 (s, 3H, CH <sub>3</sub> )                                                                          |
| 39 |        | 6.496 (brs, 1H, NH)                                                                                      |
| 40 | 33.30  | 2.478 (s, 3H, CH <sub>3</sub> )                                                                          |
| 41 | 30.91  | 1.818 (q, 1H, <i>J</i> = 7.5 Hz, CH <sub>2a</sub> ), 1.908 (q, 1H, <i>J</i> = 7.5 Hz, CH <sub>2b</sub> ) |
| 42 | 12.73  | 1.040 (t, 3H, <i>J</i> = 7.5 Hz, CH <sub>3</sub> )                                                       |
| 43 | 17.59  | 1.390 (s, 3H, CH <sub>3</sub> )                                                                          |

**Sequence I.** The codon-optimized sequence of *phomM* for expression in *E. coli*.

ATGGCTTCTGTTACCATCACCTCTGTTACGAACCGGCTAACCCGCTGGCTGTTGCTCACAC  
CGGTGAACGTGAAGTTGAAGGTGACCAGCTGATCAAAACCGACACCAACAACGACAACG  
ACATCATCAACACCCTGCTGAACAACCTTCTGTACCCGCAGGAACTGAAACACAACGTTTT  
CGTCCGCGTTTTCCAGCAGCGTATCACCATCGTTAAAGCGTGGGACATCCTGTCTCTGTCTA  
CCTCTCCGCCGAACGGTACCAACGGTGTAACGGTACCAACTCTGCTCCGCACCGTCCGAA  
AGACCTGCACATCCTGGACATCGGTTGCGGTCAGGGTGAATCTGCTGCTACCATGGCTGCT  
CTGCTGCAGCCGCACATGCACGGTGCTCGTCTGCACATCACCGGTATCGACACCGCTCGTC  
CGGACTACGGTACCCGTACACCGTTGCTGAAACCCACGCTCACCTGACCGCTTCTGCTCT  
GGGTCGTCACATCTCTTTCCGTCGTGAAGACGCTGCTGCTTTCTTCTCTCCGTCCTGCTGT  
CTTCTCCGCTCTCCGCCGGTTCTTGGCCGTCTGCTGCTAACGTTGACGCTGTTACCCTGTGC  
CACTCTCTGTGGTACTTCCCGACCCGCAGTCTGTTGCTGACCTGTTACCACCCTGGCTGG  
TGCTCGTGTTCGCGTGTTTACCTGGCTGAATACTCTTCCGTGGTTCTCTGCCGGGTGGTC  
AGCAGGACGCTCACATCCTGGCTGCTCGTGCTCAAGCTCTGCTGCACGCTTCTGTTCTGGA  
AAAAGTGTCTGCTGACTCTTCTCAACAGAACCACCAGGGTCGTGAACCGGGTCCGCGTGC  
TCCGAACGTTTCGTGCTGCTCTGGACGTTGGTTCTATCGTTGAAGCTGCTGCTGCTGGTT  
GGGCTGTTTCGTGCTCAGGGTACCTTCGTTCCGGCTGCTGACATGATCGAAGGTCACCTGGA  
AGCTCGTCTGGTTGTTAAAGACGCTTTCGCTGAAGCTGTTTCGTGCTGAAGGTCTGTCTCCG  
GAACGTGAACACGAAGTTCTGGGTCTGGTTCCGGGTGTTAAAGAAGCGTTCGCTCGTCTGG  
CTGAAGCTGGTGTGCTAAAGGTCGTGCTATGGACGTTTGGTGGGCTGAACTGGAACGTTA

**Sequence II.** The codon-optimized sequence of *metaM* for expression in *E. coli*.

ATGCAGTCTCCGGTTAAAATCCACACCGTTGAATCTTCTTACTCTGACGCTTACCAGGAAGC  
TGTTATCGCTAACTACGACGACCCGCCGGCTGTTTGGGAAAAAGTTCTGGGTGAAACCCTG  
TCTTCAACGGTGGTCTGTTTCGACGAAGCTGAACTGACCGCTGGTCCGAAACCGGGTCTG  
TTGGTGCTTCTGAATTCGTGGTATCAACCGTCAGCTGGAAGTGGCTGGTCTGCTGTCTCCG  
GACCGTCAGCTGCTGCGTCGTATCCTGGACCTGGGTGCGGTTGGGGTGTCTGACCCAGC  
ACCTGGCTAAAGTTTTCCCGAATGCCAGTGCATCGACGCTATCAACATCTCTCAACAGCA  
GCTGGACTACTGCGCTGAAAACTGCCGCCGGAAGTGCCTAACGTGTTAACCTGTACCTG  
TGCAACGCTCAAGACGTTGACCGTCTGCCGACCCGACCGAACCGTACGACTTCGTTTTCG  
TTCGTGGTGTTTACTTCCACCTGCTGCCGTCTGTTTTCGAAGCTAGTGTTGCTCGTCTGGCT  
CAACGTATCCGTCCGGGTGGTATCCTGCTGCTGTCTGACCCGCTGTACCGTGACGCTGACGT  
TGACGCTCCGGTTTCTACCGCTTCTGAACCGTCTGACGGTCTGGGTACCGGTGACCACAAA  
TCTCCGCAGTACTACACCTCTGTTCTGAAAAACACGGTTTCCAGATCCAGGACCTGCGTG  
TTCTGCCGTCTAACGCTGAATTTATCCACTGGTTCGCGTCTGCGTCTGAACATCGAAGCT  
AACTCCCGACCTTCCCGAACGGTGTCTGTTCCGGTTAAAGACCTGCACGAATTTGCTG  
AATCTTTCGCTCAAAAAGTGGCTGAAGACAAAAGTTTCTATGTACTCTATCGTTGCTCAACGT  
ACCAAAGACTAA



## References

1. Li R, *et al.* (2010) De novo assembly of human genomes with massively parallel short read sequencing. *Genome Res.* 20(2):265-272.
2. Zerbino DR & Birney E (2008) Velvet: algorithms for de novo short read assembly using de Bruijn graphs. *Genome Res.* 18(5):821-829.
3. Blanco E, Parra G, & Guigo R (2007) Using geneid to identify genes. *Curr Protoc Bioinformatics* Chapter 4:Unit 4 3.
4. Stanke M & Morgenstern B (2005) AUGUSTUS: a web server for gene prediction in eukaryotes that allows user-defined constraints. *Nucleic Acids Res* 33(Web Server issue):W465-467.
5. Galagan JE, *et al.* (2003) The genome sequence of the filamentous fungus *Neurospora crassa*. *Nature* 422(6934):859-868.
6. Cullen D, Leong SA, Wilson LJ, & Henner DJ (1987) Transformation of *Aspergillus nidulans* with the hygromycin-resistance gene, hph. *Gene* 57(1):21-26.
7. Mullaney EJ, Hamer JE, Roberti KA, Yelton MM, & Timberlake WE (1985) Primary structure of the trpC gene from *Aspergillus nidulans*. *Mol Gen Genet* 199(1):37-45.
8. Datsenko KA & Wanner BL (2000) One-step inactivation of chromosomal genes in *Escherichia coli* K-12 using PCR products. *Proc Natl Acad Sci U S A* 97(12):6640-6645.
9. Anco DJ, Kim S, Mitchell TK, Madden LV, & Ellis MA (2009) Transformation of *Phomopsis viticola* with the green fluorescent protein. *Mycologia* 101(6):853-858.
10. Ronquist F, *et al.* (2012) MrBayes 3.2: efficient Bayesian phylogenetic inference and model choice across a large model space. *Syst Biol* 61(3):539-542.
11. Pruitt KD, Tatusova T, & Maglott DR (2007) NCBI reference sequences (RefSeq): a curated non-redundant sequence database of genomes, transcripts and proteins. *Nucleic Acids Res* 35(Database issue):D61-65.
12. Marchler-Bauer A, *et al.* (2015) CDD: NCBI's conserved domain database. *Nucleic Acids Res* 43(Database issue):D222-226.
